# Supplementary material for: Alcohol and mortality in Russia: prospective observational study of 151 000 adults
Source: PubMed Central journal article supplement (PMC4007591; doi:10.1016/s0140-6736(13)62247-3), 2014-04-26
Supplement: mmc1.pdf [file mmc1.pdf]

# THE LANCET

## **Supplementary appendix**

This appendix formed part of the original submission and has been peer reviewed. We post it as supplied by the authors.

Supplement to: Zaridze D, Lewington S, Boroda A, et al. Alcohol and mortality in Russia: prospective observational study of 151 000 adults. *Lancet* 2014; published online Jan 31. [http://dx.doi.org/10.1016/S0140-6736\(13\)62247-3](http://dx.doi.org/10.1016/S0140-6736(13)62247-3).

## Russian Prospective Study Contents list of Appendix

- [p 3](#): Male all-cause mortality at ages 15-34, 35-54 and 55-74, Russia 1980-2012 and UK
- [p 4](#): Female all-cause mortality at ages 15-34, 35-54 and 55-74, Russia 1980-2012 and UK
- [p 5](#): Male and female all-cause mortality at ages 15-54, Russia 1980-2012 and UK
- [p 6](#): 2000-2012 Russian alcohol sales (litres alcohol/adult)
- [p 7](#): Number of interviewees by place, sex, recruitment phase and age at baseline
- [p 8](#): Smoking and disease history by drinking status at baseline for the 197 493 interviewees with some follow-up during ages 35-74 years (of whom 151 811 participants contribute to the main analyses)
- [p 9](#): Characteristics of the study population by sex and drinking status self-reported at baseline for 151 811 participants
- [p 10](#): ICD-10 codes and numbers of deaths at ages 35-74 years, for specific causes among 151 811 participants
- [p 11](#): Vodka use self-reported at baseline and at unintended re-interview (mean 2.9 years later): 5192 women
- [p 12](#): Observed and expected numbers of deaths from specific causes or groups of causes, by vodka use self-reported at baseline in 57 361 male smokers
- [p 13](#): Mortality from causes pre-specified as alcohol-related, other causes, and all causes, by sex, smoking habit at baseline, age at risk and vodka use self-reported at baseline among 151 811 participants
- [pp 14-15](#): 2-page baseline questionnaire\* (for phase 1 of recruitment, Jan-Dec 1999)
- [pp 16-20](#): 5-page baseline questionnaire\* (for phase 2 of recruitment, 2002-08)

\* English translation of Russian original

## Males, Total mortality Russia 1980–2012 and UK (to 2010)

Ages 15–34

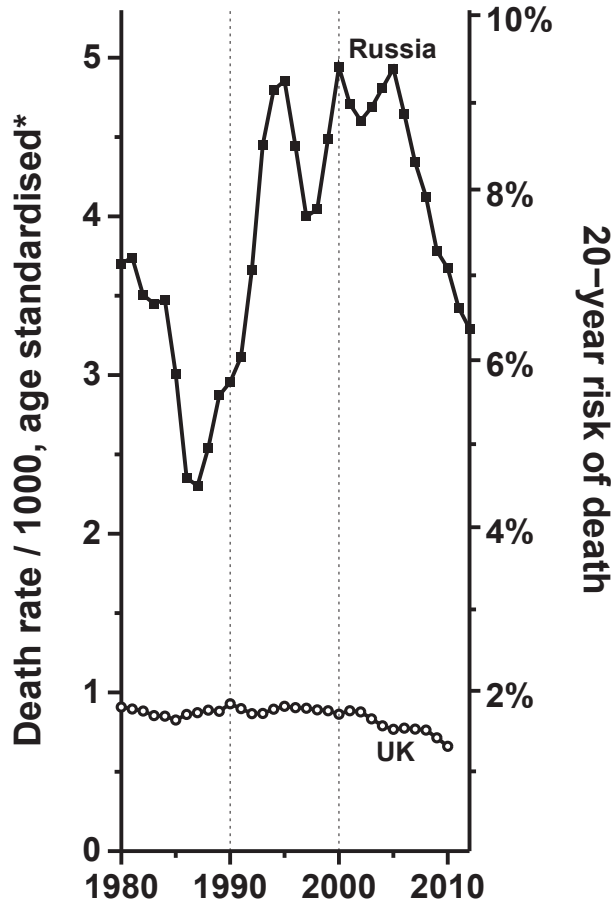

Ages 35–54

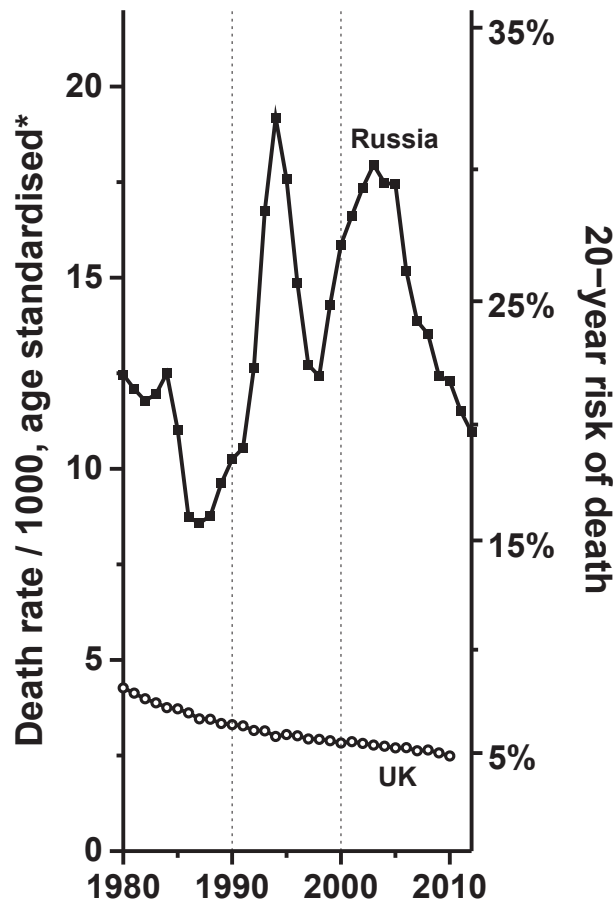

Ages 55–74

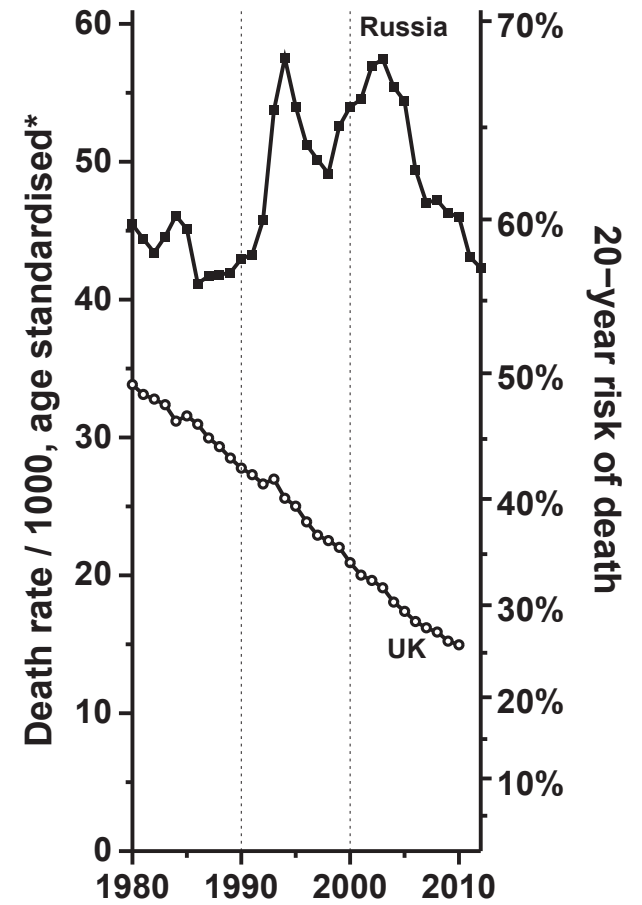

\*Mean of annual rates in four 5-year age groups

Source: WHO (& ZAGS 2011–12) mortality and UN population estimates

## Females, Total mortality Russia 1980–2012 and UK (to 2010)

**Ages 15–34**

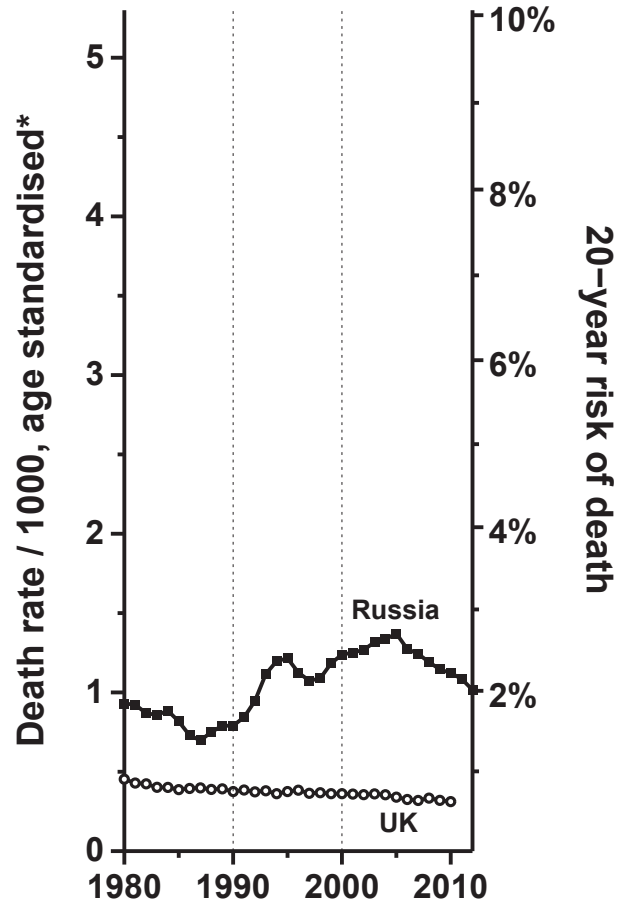

**Ages 35–54**

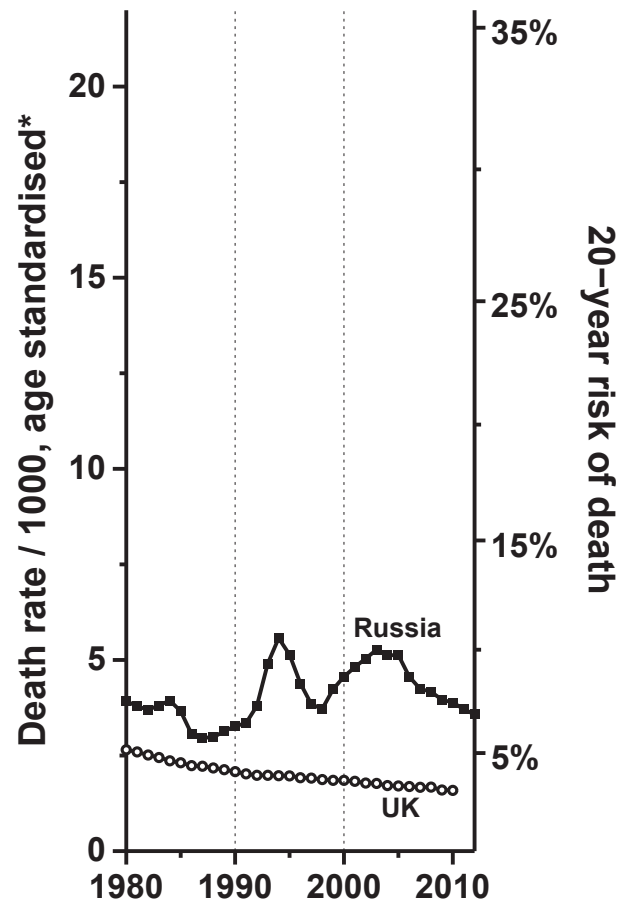

**Ages 55–74**

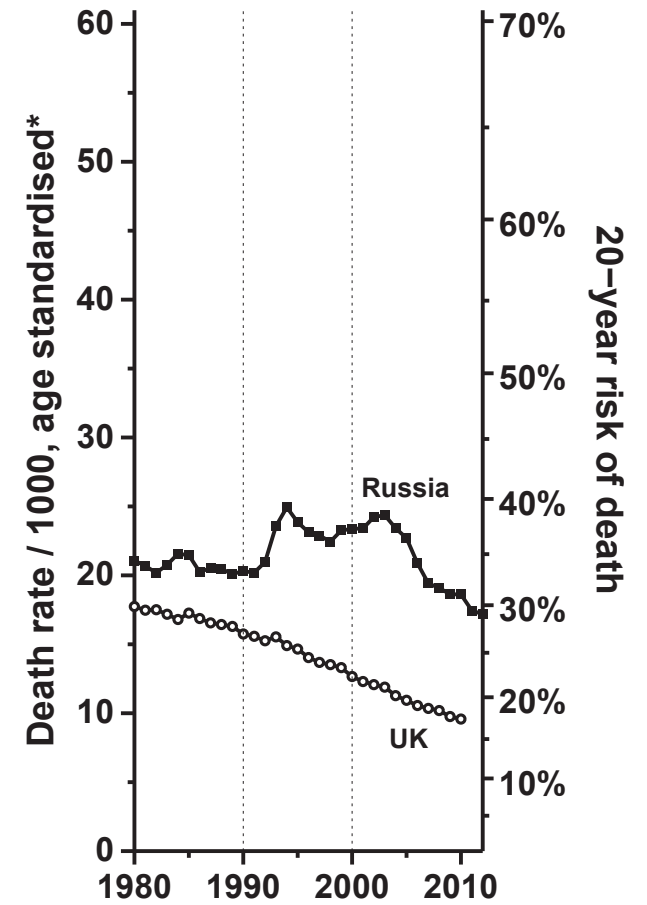

\*Mean of annual rates in four 5-year age groups

Source: WHO (& ZAGS 2011–12) mortality and UN population estimates

**All-cause mortality, males aged 15-54, in Russia 1980-2012 and UK**

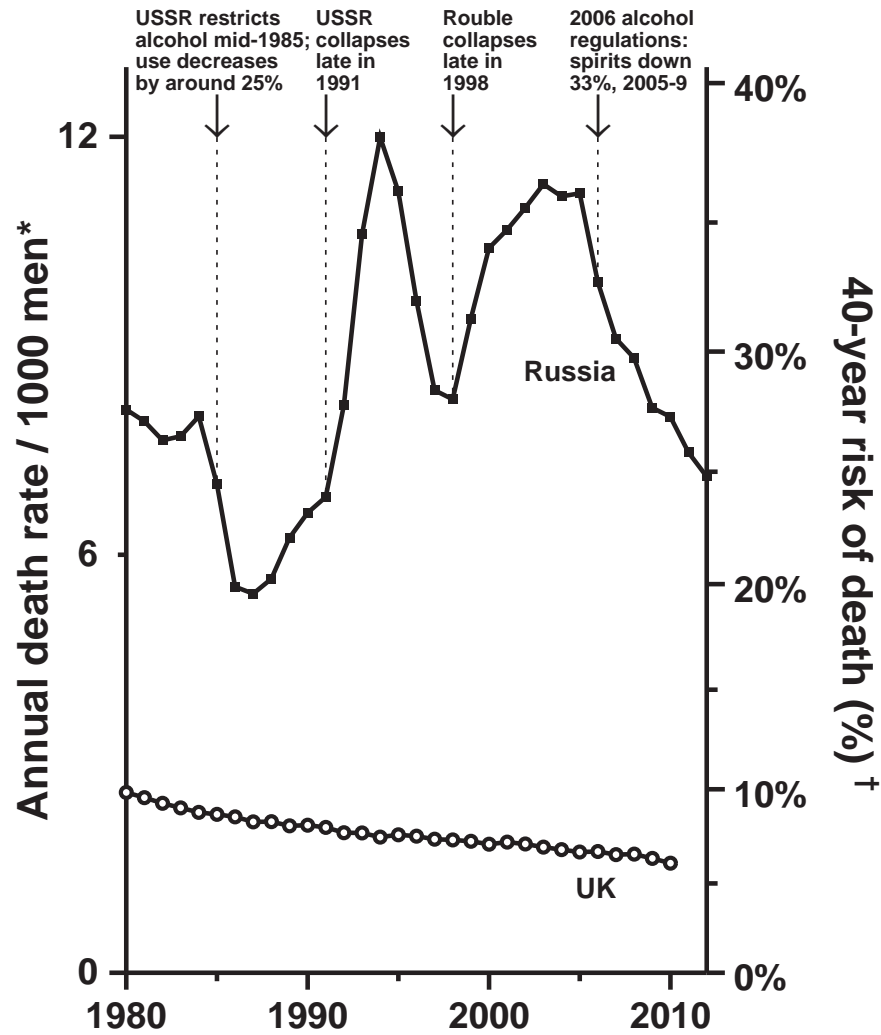

Source: WHO mortality & UN population estimates

**All-cause mortality, females aged 15-54, in Russia 1980-2012 and UK**

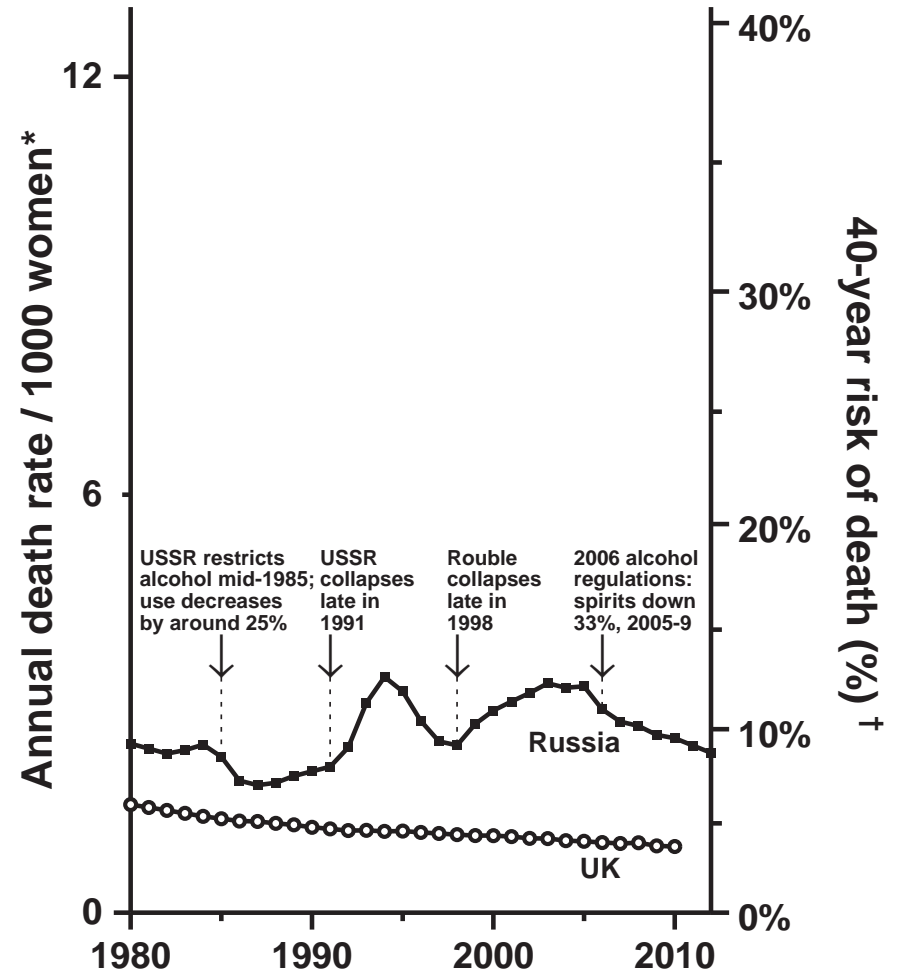

\* Mean of age-specific death rates in the eight component 5-year age groups (15-19 to 50-54)

† Probability a 15-year-old would die before age 55, if exposed over next 40 years to age-specific death rates of one particular calendar year

| <b>2000-2012 Russian alcohol sales (litres alcohol/adult), including Rosstat estimates of unrecorded spirit sales *</b> |              |             |             |                         |                              |                      |
|-------------------------------------------------------------------------------------------------------------------------|--------------|-------------|-------------|-------------------------|------------------------------|----------------------|
| <b>Year</b>                                                                                                             | <b>Total</b> | <b>Beer</b> | <b>Wine</b> | <b>Spirits recorded</b> | <b>Spirits, not recorded</b> | <b>Total spirits</b> |
| 2000                                                                                                                    | 16.64        | 2.17        | 0.70        | 7.25                    | 6.52                         | 13.77                |
| 2001                                                                                                                    | 17.40        | 2.62        | 0.74        | 7.05                    | 6.99                         | 14.04                |
| 2002                                                                                                                    | 17.28        | 2.91        | 0.79        | 7.11                    | 6.47                         | 13.58                |
| 2003                                                                                                                    | 17.44        | 3.08        | 0.89        | 7.28                    | 6.18                         | 13.46                |
| 2004                                                                                                                    | 16.93        | 3.45        | 0.94        | 7.06                    | 5.47                         | 12.53                |
| 2005                                                                                                                    | 16.42        | 3.65        | 1.02        | 6.88                    | 4.86                         | 11.74                |
| 2006 †                                                                                                                  | 15.68        | 4.11        | 1.00        | 6.72                    | 3.85                         | 10.57                |
| 2007                                                                                                                    | 14.98        | 4.75        | 1.18        | 6.37                    | 2.69                         | 9.06                 |
| 2008                                                                                                                    | 14.55        | 4.68        | 1.27        | 6.19                    | 2.40                         | 8.59                 |
| 2009                                                                                                                    | 13.65        | 4.22        | 1.26        | 5.82                    | 2.35                         | 8.17                 |
| 2010                                                                                                                    | 13.54        | 4.21        | 1.31        | 5.66                    | 2.35                         | 8.01                 |
| 2011                                                                                                                    | 13.16        | 4.11        | 1.23        | 5.47                    | 2.35                         | 7.82                 |
| 2012                                                                                                                    | 13.55        | 4.32        | 1.23        | 5.64                    | 2.35                         | 7.99                 |

\*Source: Russian government website (accessed Oct, 15 2013)

[www.gks.ru/wps/wcm/connect/rosstat\\_main/rosstat/en/main/](http://www.gks.ru/wps/wcm/connect/rosstat_main/rosstat/en/main/)

† Regulation of alcohol sales was strengthened in 2006:

Neufeld M, Rehm J. Alcohol consumption and mortality in Russia since 2000 – are there any changes following the alcohol policy changes starting in 2006? *Alcohol and alcoholism* 2013; **48**: 222-30.

## Appendix p 7: Number of interviewees by place, sex, recruitment phase and age at baseline

|                              |         | Number of interviewees |              |              |             |                    |              |              |             |               |
|------------------------------|---------|------------------------|--------------|--------------|-------------|--------------------|--------------|--------------|-------------|---------------|
| Recruitment phase (and year) | Place   | Male                   |              |              |             | Female             |              |              |             | Total         |
|                              |         | <35 y <sup>a</sup>     | 35-54 y      | 55-74 y      | 75+ y       | <35 y <sup>a</sup> | 35-54 y      | 55-74 y      | 75+ y       |               |
| Phase 1 (1999)               | Barnaul | 1710                   | 8308         | 5345         | 1000        | 2249               | 11221        | 9446         | 2957        | 42236         |
|                              | Tomsk   | 1181                   | 6247         | 3924         | 708         | 1535               | 8463         | 6432         | 1931        | 30421         |
| Phase 2 (2002-08)            | Barnaul | 7095                   | 19181        | 12259        | 0           | 4267               | 11444        | 9784         | 0           | 64030         |
|                              | Byisk   | 1793                   | 5851         | 3320         | 0           | 709                | 2648         | 2535         | 0           | 16856         |
|                              | Tomsk   | 5877                   | 15609        | 8727         | 0           | 3885               | 13440        | 8921         | 0           | 56459         |
| <b>Total</b>                 |         | <b>17656</b>           | <b>55196</b> | <b>33575</b> | <b>1708</b> | <b>12645</b>       | <b>47216</b> | <b>37118</b> | <b>4888</b> | <b>210002</b> |

<sup>a</sup> 24 388 of those aged <35 years at baseline had some follow-up at ages 35-74 years, so total with some follow-up at ages 35-74 years is 197 493.

**Appendix p 8: Smoking and disease history by drinking status at baseline for the 197 493 interviewees with some follow-up during ages 35-74 years (of whom 151 811 participants contribute to the main analyses<sup>a</sup>)**

|                                                                                                    | Number of interviewees  |                                                       |                         |                          |        |                          |                                                       |                         |                          |       |
|----------------------------------------------------------------------------------------------------|-------------------------|-------------------------------------------------------|-------------------------|--------------------------|--------|--------------------------|-------------------------------------------------------|-------------------------|--------------------------|-------|
|                                                                                                    | Male                    |                                                       |                         |                          |        | Female                   |                                                       |                         |                          |       |
|                                                                                                    | Never-drinker           | Ex-drinker (had quit because of illness) <sup>a</sup> | Other ex-drinker        | Current drinker          | Total  | Never-drinker            | Ex-drinker (had quit because of illness) <sup>a</sup> | Other ex-drinker        | Current drinker          | Total |
| Self-reported history of a disease that caused exclusion <sup>a</sup>                              | 1454                    | 3246                                                  | 861                     | 13796                    | 19357  | 6599                     | 2809                                                  | 1148                    | 10118                    | 20674 |
| No self-reported history of specific disease, but had quit smoking because of illness <sup>a</sup> | 158                     | 342                                                   | 74                      | 1823                     | 2397   | 72                       | 55                                                    | 13                      | 306                      | 446   |
| All others                                                                                         | <b>4247<sup>b</sup></b> | 1342                                                  | <b>3182<sup>b</sup></b> | <b>71882<sup>b</sup></b> | 80653  | <b>16236<sup>b</sup></b> | 1466                                                  | <b>2371<sup>b</sup></b> | <b>53893<sup>b</sup></b> | 73966 |
| Total                                                                                              | 5859                    | 4930                                                  | 4117                    | 87501                    | 102407 | 22907                    | 4330                                                  | 3532                    | 64317                    | 95086 |

<sup>a</sup> People with a self-reported history of cancer, MI, angina, heart failure, rheumatic heart disease, stroke, diabetes, TB, liver cirrhosis or chronic hepatitis were excluded from the main analyses, as were those who had stopped drinking or smoking because of illness.

<sup>b</sup> These six groups are the 151 811 participants (79 311 male, 72 500 female) who contribute to the main analyses.



**Appendix p 9: Characteristics of the study population by sex and drinking status self-reported at baseline for 151 811 participants<sup>a</sup>**

|                                                      | Male          |             |                 | Female        |             |                 |
|------------------------------------------------------|---------------|-------------|-----------------|---------------|-------------|-----------------|
|                                                      | Never-drinker | Ex-drinker  | Current drinker | Never-drinker | Ex-drinker  | Current drinker |
| Number of interviewees                               | 4247          | 3182        | 71882           | 16236         | 2371        | 53893           |
| Mean (SD) age, years                                 | 46.9 (12.1)   | 49.0 (11.5) | 46.5 (11.0)     | 51.5 (12.9)   | 55.1 (13.3) | 46.9 (11.2)     |
| Never smoker, n (%)                                  | 1959 (46.1)   | 605 (19.0)  | 12565 (17.5)    | 14694 (90.5)  | 2026 (85.4) | 40763 (75.6)    |
| Ex-smoker, n (%)                                     | 392 (9.2)     | 543 (17.1)  | 5886 (8.2)      | 325 (2.0)     | 107 (4.5)   | 2307 (4.3)      |
| Current smoker, n (%)                                | 1896 (44.6)   | 2034 (63.9) | 53431 (74.3)    | 1217 (7.5)    | 238 (10.0)  | 10823 (20.1)    |
| Mean (SD) number of cigarettes/day                   | 15.9 (7.3)    | 19.0 (8.1)  | 17.1 (6.9)      | 9.8 (6.4)     | 11.4 (6.7)  | 9.8 (5.5)       |
| Mean (SD) BMI <sup>b</sup> , kg/m <sup>2</sup>       | 25.7 (3.7)    | 25.6 (3.7)  | 25.9 (3.4)      | 26.8 (4.8)    | 27.4 (4.9)  | 27.0 (4.5)      |
| Mean (SD) SBP <sup>b</sup> , mmHg                    | 128 (17.2)    | 128 (15.7)  | 128 (15.5)      | 130 (21.0)    | 134 (22.2)  | 127 (18.4)      |
| Mean (SD) DBP <sup>b</sup> , mmHg                    | 82 (10.1)     | 82 (9.3)    | 82 (8.9)        | 82 (11.3)     | 84 (11.7)   | 81 (10.7)       |
| No education beyond primary school, n (%)            | 446 (10.5)    | 381 (12.0)  | 4605 (6.4)      | 2528 (15.6)   | 426 (18.0)  | 3339 (6.2)      |
| Manual worker, n (%)                                 | 1847 (43.5)   | 2123 (66.7) | 40772 (56.7)    | 3502 (21.6)   | 796 (33.6)  | 13332 (24.7)    |
| Good cooperation with interview <sup>c</sup> , n (%) | 3902 (91.9)   | 2924 (91.9) | 64563 (89.8)    | 15007 (92.4)  | 2140 (90.3) | 49459 (91.8)    |

<sup>a</sup> Excludes people with no follow-up at ages 35-74 years or with evidence at baseline of pre-existing disease (self-reported cancer, myocardial infarction (MI), angina, heart failure, rheumatic heart disease, stroke, diabetes, tuberculosis (TB), liver cirrhosis or chronic hepatitis), or who had already quit drinking or smoking due to illness.

<sup>b</sup> Only 58 387 males and 41 738 females, as height, weight and blood pressure were not measured during the first phase of recruitment.

<sup>c</sup> As assessed by interviewer.

**Appendix p 10: ICD-10 codes and numbers of deaths at ages 35-74 years, for specific causes of death among 151 811<sup>a</sup> participants**

| Cause of death                          | ICD-10 code(s)                      | Number of deaths   |                      |
|-----------------------------------------|-------------------------------------|--------------------|----------------------|
|                                         |                                     | Male<br>(n=79 311) | Female<br>(n=72 500) |
| <b>Pre-specified alcohol-related</b>    | Sum of components below             | 2807               | 782                  |
| External causes                         | F10, S00-T99, V00-Y99               | 966                | 243                  |
| Alcohol poisoning                       | F10, T51, X45, Y15                  | 92                 | 17                   |
| Suicide                                 | X60-84                              | 133                | 26                   |
| Assault                                 | X85-Y09, Y35-36                     | 92                 | 23                   |
| Transport accidents                     | V00-99                              | 47                 | 25                   |
| Other external                          | Remainder of S00-T99, W00-Y99       | 602                | 152                  |
| Liver cancer                            | C22                                 | 40                 | 24                   |
| Other liver disease <sup>b</sup>        | B15-19, K70-77, I85                 | 128                | 87                   |
| Upper aerodigestive cancer              | C00-15, 32                          | 121                | 9                    |
| Tuberculosis                            | A15-19, B90                         | 110                | 8                    |
| Pneumonia, etc <sup>b</sup>             | J00-39, J60-98                      | 223                | 73                   |
| Non-MI acute IHD                        | I24                                 | 824                | 217                  |
| Non-neoplastic pancreatic disease       | K85-86                              | 50                 | 21                   |
| Ill-specified disease                   | R00-99                              | 345                | 100                  |
| <b>Other vascular diseases</b>          | Sum of components below             | 1258               | 703                  |
| Acute MI or angina                      | I20-23                              | 205                | 87                   |
| Chronic IHD                             | I25                                 | 308                | 134                  |
| Stroke                                  | I60-69                              | 501                | 382                  |
| Other vascular disease                  | I00-99 except I20-25, 27, 60-69, 85 | 244                | 100                  |
| <b>Other neoplastic diseases</b>        | Sum of components below             | 842                | 471                  |
| Lung cancer                             | C33-34                              | 389                | 39                   |
| Breast cancer                           | C50                                 | 2                  | 112                  |
| Colorectal cancer                       | C18-21, 26                          | 105                | 105                  |
| Pancreatic cancer                       | C25                                 | 54                 | 30                   |
| Stomach cancer                          | C16                                 | 150                | 70                   |
| Cancer site unspecified                 | C76-80                              | 35                 | 25                   |
| Other neoplastic diseases               | Remainder of C00-99, D00-48         | 107                | 90                   |
| <b>Other diseases</b>                   | Sum of components below             | 505                | 341                  |
| Gastro-oesophageal disease <sup>b</sup> | K20-31, 92                          | 45                 | 21                   |
| Peritonitis                             | K65                                 | 7                  | 4                    |
| COPD <sup>b</sup>                       | I27, J40-47                         | 110                | 27                   |
| Other specified disease                 | Any remaining causes                | 343                | 289                  |
| <b>All causes</b>                       | A00-T98, V01-Z99                    | 5412               | 2297                 |

n = number of risk.

COPD=chronic obstructive pulmonary disease; IHD=ischaemic heart disease; MI=myocardial infarction.

<sup>a</sup> Excludes people with no follow-up at ages 35-74 years or with evidence at baseline of pre-existing disease (self-reported cancer, myocardial infarction (MI), angina, heart failure, rheumatic heart disease, stroke, diabetes, tuberculosis (TB), liver cirrhosis or chronic hepatitis), or who had already quit drinking or smoking due to illness.

<sup>b</sup> Differences compared with the 2009 report (and numbers of deaths affected): I85 (oesophageal varices, 4 deaths) moved from gastro-oesophageal disease to other liver disease and J67 (hypersensitivity pneumonitis, 0 deaths) moved from COPD to other respiratory.

## Appendix p 11: Vodka use self-reported at baseline and at unintended re-interview (mean 2.9 years later): 5192 women<sup>a</sup>

Groupings in this table are defined only by vodka consumption, but mean alcohol consumption includes all drinks, and is expressed in units of 200g of pure alcohol per week (the approximate alcohol content of one bottle of vodka)

|                                                                                       |         | Number (%)                                            |                    |              |
|---------------------------------------------------------------------------------------|---------|-------------------------------------------------------|--------------------|--------------|
|                                                                                       |         | Half-litre bottles of vodka/week reported at baseline |                    |              |
|                                                                                       |         | <¼<br>n = 4935                                        | ¼ to <1<br>n = 187 | ≥1<br>n = 70 |
| Half-litre bottles of vodka/week reported at re-interview                             | <¼      | 4658 (94%)                                            | 144 (77%)          | 42 (60%)     |
|                                                                                       | ¼ to <1 | 230 (5%)                                              | 37 (20%)           | 7 (10%)      |
|                                                                                       | ≥1      | 47 (1%)                                               | 6 (3%)             | 21 (30%)     |
| Mean (SD) vodka consumption reported at baseline, in units of 200g alcohol/week       |         | 0.0 (0.0)                                             | 0.4 (0.1)          | 1.6 (1.1)    |
| Mean (SD) vodka consumption reported at re-interview, in units of 200g alcohol/week   |         | 0.1 (0.2)                                             | 0.2 (0.3)          | 0.8 (1.4)    |
| Mean (SD) alcohol consumption reported at re-interview, in units of 200g alcohol/week |         | 0.2 (0.3)                                             | 0.4 (0.4)          | 1.0 (1.3)    |

<sup>a</sup> 5192 women were unintentionally interviewed twice, generally once during phase 1 and once during phase 2 of recruitment. This number excludes women with no follow-up at ages 35-74 years, or with evidence at baseline (ie, at the first interview) of pre-existing disease (self-reported cancer, MI, angina, heart failure, rheumatic heart disease, stroke, diabetes, TB, liver cirrhosis, chronic hepatitis), or who at baseline had already quit drinking or smoking due to illness.

**Appendix p 12: Observed and expected numbers of deaths from specific causes or groups of causes, by vodka use self-reported at baseline in 57 361 male smokers<sup>a</sup>  
(Expected numbers are calculated by applying the age-specific rates among those who reported drinking <1 bottle vodka/week<sup>b</sup>)**

| Cause of death                          | 35-54 years                        |              |            |                                  |             |            | 55-74 years                        |              |            |                                  |              |            |
|-----------------------------------------|------------------------------------|--------------|------------|----------------------------------|-------------|------------|------------------------------------|--------------|------------|----------------------------------|--------------|------------|
|                                         | 1-<3 half-litre bottles vodka/week |              |            | 3+ half-litre bottles vodka/week |             |            | 1-<3 half-litre bottles vodka/week |              |            | 3+ half-litre bottles vodka/week |              |            |
|                                         | Observed                           | Expected     | O/E        | Observed                         | Expected    | O/E        | Observed                           | Expected     | O/E        | Observed                         | Expected     | O/E        |
| <b>Pre-specified as alcohol-related</b> | <b>313</b>                         | <b>195.0</b> | <b>1.6</b> | <b>197</b>                       | <b>54.1</b> | <b>3.6</b> | <b>230</b>                         | <b>169.1</b> | <b>1.4</b> | <b>115</b>                       | <b>46.9</b>  | <b>2.5</b> |
| External causes                         | 138                                | 79.6         | 1.7        | 67                               | 22.1        | 3.0        | 52                                 | 42.1         | 1.2        | 34                               | 11.7         | 2.9        |
| Alcohol poisoning                       | 14                                 | 7.7          | 1.8        | 10                               | 2.1         | 4.7        | 1                                  | 2.6          | 0.4        | 3                                | 0.7          | 4.2        |
| Suicide                                 | 15                                 | 12.8         | 1.2        | 8                                | 3.6         | 2.2        | 9                                  | 6.9          | 1.3        | 2                                | 1.9          | 1.0        |
| Assault                                 | 13                                 | 8.2          | 1.6        | 8                                | 2.3         | 3.5        | 7                                  | 4.4          | 1.6        | 2                                | 1.2          | 1.7        |
| Transport accidents                     | 8                                  | 3.6          | 2.2        | 1                                | 1.0         | 1.0        | 5                                  | 1.3          | 3.9        | 0                                | 0.4          | 0.0        |
| Other external                          | 88                                 | 47.2         | 1.9        | 40                               | 13.1        | 3.1        | 30                                 | 26.9         | 1.1        | 27                               | 7.5          | 3.6        |
| Liver cancer                            | 0                                  | 1.0          | 0.0        | 0                                | 0.3         | 0.0        | 3                                  | 5.1          | 0.6        | 1                                | 1.4          | 0.7        |
| Other liver disease                     | 7                                  | 10.0         | 0.7        | 9                                | 2.8         | 3.2        | 8                                  | 6.7          | 1.2        | 6                                | 1.9          | 3.2        |
| Upper aerodigestive cancer              | 8                                  | 4.9          | 1.6        | 6                                | 1.4         | 4.4        | 16                                 | 13.6         | 1.2        | 4                                | 3.8          | 1.1        |
| Tuberculosis                            | 20                                 | 8.2          | 2.4        | 15                               | 2.3         | 6.6        | 10                                 | 6.9          | 1.4        | 2                                | 1.9          | 1.0        |
| Pneumonia, etc                          | 24                                 | 13.1         | 1.8        | 22                               | 3.6         | 6.1        | 24                                 | 16.9         | 1.4        | 10                               | 4.7          | 2.1        |
| Non-MI acute IHD                        | 76                                 | 47.5         | 1.6        | 44                               | 13.2        | 3.3        | 91                                 | 58.0         | 1.6        | 42                               | 16.1         | 2.6        |
| Non-neoplastic pancreatic disease       | 3                                  | 5.4          | 0.6        | 7                                | 1.5         | 4.7        | 1                                  | 1.3          | 0.8        | 3                                | 0.4          | 8.3        |
| Ill-specified disease                   | 37                                 | 25.4         | 1.5        | 27                               | 7.0         | 3.8        | 25                                 | 18.5         | 1.4        | 13                               | 5.1          | 2.5        |
| <b>Other vascular diseases</b>          | <b>63</b>                          | <b>45.4</b>  | <b>1.4</b> | <b>21</b>                        | <b>12.6</b> | <b>1.7</b> | <b>114</b>                         | <b>121.4</b> | <b>0.9</b> | <b>47</b>                        | <b>33.6</b>  | <b>1.4</b> |
| Acute MI or angina                      | 12                                 | 8.7          | 1.4        | 4                                | 2.4         | 1.7        | 16                                 | 21.3         | 0.8        | 9                                | 5.9          | 1.5        |
| Chronic IHD                             | 9                                  | 8.7          | 1.0        | 3                                | 2.4         | 1.2        | 27                                 | 34.9         | 0.8        | 14                               | 9.7          | 1.4        |
| Stroke                                  | 19                                 | 15.4         | 1.2        | 8                                | 4.3         | 1.9        | 52                                 | 48.2         | 1.1        | 18                               | 13.4         | 1.3        |
| Other vascular disease                  | 23                                 | 12.6         | 1.8        | 6                                | 3.5         | 1.7        | 19                                 | 16.9         | 1.1        | 6                                | 4.7          | 1.3        |
| <b>Other neoplastic diseases</b>        | <b>24</b>                          | <b>32.1</b>  | <b>0.7</b> | <b>14</b>                        | <b>8.9</b>  | <b>1.6</b> | <b>100</b>                         | <b>88.0</b>  | <b>1.1</b> | <b>29</b>                        | <b>24.4</b>  | <b>1.2</b> |
| Lung cancer                             | 8                                  | 14.6         | 0.5        | 7                                | 4.1         | 1.7        | 52                                 | 50.8         | 1.0        | 16                               | 14.1         | 1.1        |
| Breast cancer                           | 1                                  | 0.0          | -          | 0                                | 0.0         | -          | 0                                  | 0.0          | -          | 0                                | 0.0          | -          |
| Colorectal cancer                       | 3                                  | 3.9          | 0.8        | 1                                | 1.1         | 0.9        | 12                                 | 7.4          | 1.6        | 3                                | 2.1          | 1.5        |
| Pancreatic cancer                       | 3                                  | 1.3          | 2.3        | 0                                | 0.4         | 0.0        | 6                                  | 4.6          | 1.3        | 4                                | 1.3          | 3.1        |
| Stomach cancer                          | 4                                  | 6.2          | 0.6        | 3                                | 1.7         | 1.8        | 19                                 | 12.3         | 1.5        | 3                                | 3.4          | 0.9        |
| Cancer site unspecified                 | 1                                  | 2.1          | 0.5        | 2                                | 0.6         | 3.5        | 5                                  | 3.1          | 1.6        | 1                                | 0.9          | 1.2        |
| Other neoplastic diseases               | 4                                  | 4.1          | 1.0        | 1                                | 1.1         | 0.9        | 6                                  | 9.8          | 0.6        | 2                                | 2.7          | 0.7        |
| <b>Other diseases</b>                   | <b>20</b>                          | <b>20.0</b>  | <b>1.0</b> | <b>11</b>                        | <b>5.6</b>  | <b>2.0</b> | <b>44</b>                          | <b>51.8</b>  | <b>0.8</b> | <b>24</b>                        | <b>14.4</b>  | <b>1.7</b> |
| Gastro-oesophageal disease              | 4                                  | 2.6          | 1.6        | 1                                | 0.7         | 1.4        | 1                                  | 4.6          | 0.2        | 2                                | 1.3          | 1.6        |
| Peritonitis                             | 0                                  | 0.3          | 0.0        | 1                                | 0.1         | 14.3       | 1                                  | 0.3          | 3.8        | 1                                | 0.1          | 14.3       |
| COPD                                    | 4                                  | 2.3          | 1.7        | 1                                | 0.6         | 1.6        | 10                                 | 16.2         | 0.6        | 6                                | 4.5          | 1.3        |
| Other specified disease                 | 12                                 | 14.9         | 0.8        | 8                                | 4.1         | 1.9        | 32                                 | 30.8         | 1.0        | 15                               | 8.5          | 1.8        |
| <b>All causes</b>                       | <b>420</b>                         | <b>292.5</b> | <b>1.4</b> | <b>243</b>                       | <b>81.1</b> | <b>3.0</b> | <b>488</b>                         | <b>430.3</b> | <b>1.1</b> | <b>215</b>                       | <b>119.3</b> | <b>1.8</b> |

<sup>a</sup> Excludes people with no follow-up at ages 35-74 years or with evidence of pre-existing disease (self-reported cancer, MI, angina, heart failure, rheumatic heart disease, stroke, diabetes, TB, liver cirrhosis or chronic hepatitis) or quit drinking or smoking due to illness.

<sup>b</sup> Never-drinkers, ex-drinkers who did not quit because of illness and current low drinkers (<1 bottle of vodka or equivalent/week).

**Appendix p 13: Mortality from causes pre-specified as alcohol-related, other causes, and all causes, by sex, smoking habit at baseline, age at risk and vodka use self-reported at baseline among 151 811 participants<sup>a</sup>**  
Omits the few (2739/151 811) female ex-smokers in Table 3. Vodka use is given in half-litre bottles of vodka per week.

|                                        | Pre-specified as alcohol-related |                              | Other causes |                              | All causes |                              |
|----------------------------------------|----------------------------------|------------------------------|--------------|------------------------------|------------|------------------------------|
|                                        | Deaths                           | Annual rate/1000<br>(95% CI) | Deaths       | Annual rate/1000<br>(95% CI) | Deaths     | Annual rate/1000<br>(95% CI) |
| <b>Male smokers (n=57 361)</b>         |                                  |                              |              |                              |            |                              |
| Age at risk: 35-54                     |                                  |                              |              |                              |            |                              |
| Never-drinker                          | 38                               | 4.9 (3.5-6.7)                | 21           | 2.8 (1.8-4.3)                | 59         | 7.7 (5.9-10.0)               |
| Ex-drinker <sup>b</sup>                | 47                               | 6.2 (4.6-8.2)                | 20           | 2.5 (1.6-3.9)                | 67         | 8.7 (6.8-11.0)               |
| <1 <sup>c</sup>                        | 675                              | 5.5 (5.1-6.0)                | 339          | 3.1 (2.7-3.4)                | 1014       | 8.5 (8.0-9.1)                |
| 1 to <3 <sup>c</sup>                   | 313                              | 8.1 (7.2-9.0)                | 107          | 3.0 (2.5-3.6)                | 420        | 11.0 (10.0-12.2)             |
| ≥3 <sup>c</sup>                        | 197                              | 17.3 (14.9-20.0)             | 46           | 4.1 (3.0-5.5)                | 243        | 21.3 (18.7-24.3)             |
| Age at risk: 55-74                     |                                  |                              |              |                              |            |                              |
| Never-drinker                          | 30                               | 11.0 (7.7-15.9)              | 76           | 25.6 (20.4-32.2)             | 106        | 36.7 (30.2-44.5)             |
| Ex-drinker <sup>b</sup>                | 34                               | 14.5 (10.3-20.3)             | 68           | 26.2 (20.6-33.3)             | 102        | 40.6 (33.4-49.4)             |
| <1 <sup>c</sup>                        | 595                              | 14.0 (12.8-15.2)             | 874          | 19.9 (18.5-21.3)             | 1469       | 33.8 (32.1-35.7)             |
| 1 to <3 <sup>c</sup>                   | 230                              | 17.7 (15.5-20.1)             | 258          | 21.0 (18.6-23.7)             | 488        | 38.7 (35.4-42.3)             |
| ≥3 <sup>c</sup>                        | 115                              | 26.3 (21.8-31.8)             | 100          | 24.8 (20.3-30.3)             | 215        | 51.1 (44.5-58.7)             |
| <b>Male ex-smokers (n=6821)</b>        |                                  |                              |              |                              |            |                              |
| Age at risk: 35-54                     |                                  |                              |              |                              |            |                              |
| Never-drinker                          | 2                                | 1.7 (0.4-6.7)                | 2            | 1.6 (0.4-6.6)                | 4          | 3.3 (1.2-8.8)                |
| Ex-drinker <sup>b</sup>                | 2                                | 1.3 (0.3-5.2)                | 1            | 0.6 (0.1-4.4)                | 3          | 1.9 (0.6-6.0)                |
| <1 <sup>c</sup>                        | 38                               | 3.1 (2.2-4.3)                | 23           | 1.9 (1.2-2.9)                | 61         | 5.0 (3.8-6.5)                |
| 1 to <3 <sup>c</sup>                   | 8                                | 4.4 (2.2-8.9)                | 2            | 1.1 (0.3-4.3)                | 10         | 5.5 (3.0-10.3)               |
| ≥3 <sup>c</sup>                        | 6                                | 16.0 (6.9-37.0)              | 1            | 2.6 (0.4-18.7)               | 7          | 18.6 (8.7-39.9)              |
| Age at risk: 55-74                     |                                  |                              |              |                              |            |                              |
| Never-drinker                          | 5                                | 5.3 (2.2-12.7)               | 15           | 14.5 (8.7-24.3)              | 20         | 19.8 (12.7-30.8)             |
| Ex-drinker <sup>b</sup>                | 13                               | 11.5 (6.6-19.9)              | 19           | 16.5 (10.4-26.0)             | 32         | 28.0 (19.7-39.7)             |
| <1 <sup>c</sup>                        | 88                               | 9.1 (7.4-11.2)               | 158          | 15.5 (13.2-18.1)             | 246        | 24.6 (21.7-27.9)             |
| 1 to <3 <sup>c</sup>                   | 15                               | 11.6 (7.0-19.2)              | 26           | 19.6 (13.3-28.9)             | 41         | 31.2 (22.9-42.4)             |
| ≥3 <sup>c</sup>                        | 7                                | 24.0 (11.4-50.6)             | 3            | 10.0 (3.2-31.1)              | 10         | 34.0 (18.2-63.4)             |
| <b>Male never smokers (n=15 129)</b>   |                                  |                              |              |                              |            |                              |
| Age at risk: 35-54                     |                                  |                              |              |                              |            |                              |
| Never-drinker                          | 15                               | 2.4 (1.4-3.9)                | 18           | 3.4 (2.1-5.6)                | 33         | 5.8 (4.1-8.2)                |
| Ex-drinker <sup>b</sup>                | 7                                | 5.0 (2.4-10.6)               | 2            | 1.5 (0.4-6.1)                | 9          | 6.5 (3.4-12.6)               |
| <1 <sup>c</sup>                        | 97                               | 3.4 (2.8-4.2)                | 58           | 2.4 (1.8-3.1)                | 155        | 5.8 (4.9-6.8)                |
| 1 to <3 <sup>c</sup>                   | 19                               | 5.1 (3.2-8.0)                | 7            | 2.5 (1.2-5.3)                | 26         | 7.6 (5.2-11.3)               |
| ≥3 <sup>c</sup>                        | 12                               | 19.4 (10.9-34.6)             | 3            | 6.4 (2.0-20.1)               | 15         | 25.8 (15.4-43.2)             |
| Age at risk: 55-74                     |                                  |                              |              |                              |            |                              |
| Never-drinker                          | 26                               | 5.1 (3.5-7.6)                | 60           | 14.2 (11.0-18.4)             | 86         | 19.3 (15.6-24.0)             |
| Ex-drinker <sup>b</sup>                | 6                                | 5.1 (2.2-11.4)               | 12           | 10.8 (6.1-19.3)              | 18         | 15.9 (9.9-25.4)              |
| <1 <sup>c</sup>                        | 113                              | 4.9 (4.1-6.0)                | 247          | 13.3 (11.7-15.2)             | 360        | 18.3 (16.4-20.3)             |
| 1 to <3 <sup>c</sup>                   | 35                               | 12.9 (9.2-18.0)              | 32           | 16.0 (11.3-22.7)             | 67         | 28.9 (22.7-36.8)             |
| ≥3 <sup>c</sup>                        | 19                               | 24.5 (15.5-38.9)             | 7            | 13.4 (6.3-28.2)              | 26         | 37.9 (25.7-56.0)             |
| <b>Female smokers (n=12 278)</b>       |                                  |                              |              |                              |            |                              |
| Age at risk: 35-54                     |                                  |                              |              |                              |            |                              |
| Never-drinker                          | 16                               | 3.7 (2.3-6.1)                | 15           | 3.1 (1.8-5.2)                | 31         | 6.8 (4.8-9.8)                |
| Ex-drinker <sup>b</sup>                | 2                                | 2.8 (0.7-11.1)               | 3            | 4.2 (1.3-13.1)               | 5          | 6.9 (2.9-16.8)               |
| <¼ <sup>c</sup>                        | 74                               | 3.5 (2.7-4.4)                | 51           | 2.2 (1.6-3.0)                | 125        | 5.7 (4.7-6.9)                |
| ¼ to <1 <sup>c</sup>                   | 18                               | 4.2 (2.6-6.7)                | 13           | 2.9 (1.7-5.1)                | 31         | 7.1 (5.0-10.2)               |
| ≥1 <sup>c</sup>                        | 32                               | 8.9 (6.1-12.8)               | 6            | 1.6 (0.7-3.6)                | 38         | 10.5 (7.5-14.6)              |
| Age at risk: 55-74                     |                                  |                              |              |                              |            |                              |
| Never-drinker                          | 8                                | 8.3 (4.0-17.1)               | 18           | 13.1 (8.1-21.1)              | 26         | 21.4 (14.3-31.9)             |
| Ex-drinker <sup>b</sup>                | 2                                | 8.4 (2.1-34.1)               | 7            | 26.9 (12.5-57.8)             | 9          | 35.2 (18.1-68.8)             |
| <¼ <sup>c</sup>                        | 28                               | 7.7 (5.2-11.3)               | 63           | 14.6 (11.2-18.9)             | 91         | 22.3 (17.9-27.6)             |
| ¼ to <1 <sup>c</sup>                   | 7                                | 11.4 (5.3-24.5)              | 8            | 8.9 (4.4-17.9)               | 15         | 20.3 (12.1-34.0)             |
| ≥1 <sup>c</sup>                        | 24                               | 32.9 (21.1-51.1)             | 11           | 12.0 (6.5-22.1)              | 35         | 44.8 (31.6-63.7)             |
| <b>Female never smokers (n=57 481)</b> |                                  |                              |              |                              |            |                              |
| Age at risk: 35-54                     |                                  |                              |              |                              |            |                              |
| Never-drinker                          | 23                               | 0.6 (0.4-0.9)                | 68           | 1.4 (1.1-1.8)                | 91         | 2.0 (1.6-2.5)                |
| Ex-drinker <sup>b</sup>                | 3                                | 1.0 (0.3-3.0)                | 4            | 1.3 (0.5-3.4)                | 7          | 2.2 (1.0-4.7)                |
| <¼ <sup>c</sup>                        | 134                              | 1.0 (0.9-1.2)                | 147          | 1.0 (0.8-1.2)                | 281        | 2.0 (1.8-2.3)                |
| ¼ to <1 <sup>c</sup>                   | 7                                | 1.0 (0.5-2.2)                | 6            | 0.8 (0.4-1.8)                | 13         | 1.8 (1.1-3.2)                |
| ≥1 <sup>c</sup>                        | 8                                | 4.9 (2.4-9.8)                | 3            | 1.6 (0.5-5.0)                | 11         | 6.5 (3.6-11.8)               |
| Age at risk: 55-74                     |                                  |                              |              |                              |            |                              |
| Never-drinker                          | 130                              | 2.4 (2.0-2.9)                | 433          | 8.0 (7.2-8.8)                | 563        | 10.4 (9.5-11.4)              |
| Ex-drinker <sup>b</sup>                | 19                               | 3.3 (2.1-5.2)                | 49           | 7.2 (5.4-9.6)                | 68         | 10.5 (8.2-13.4)              |
| <¼ <sup>c</sup>                        | 185                              | 2.1 (1.8-2.5)                | 537          | 6.8 (6.3-7.4)                | 722        | 9.0 (8.3-9.6)                |
| ¼ to <1 <sup>c</sup>                   | 25                               | 7.6 (5.1-11.4)               | 21           | 6.8 (4.4-10.4)               | 46         | 14.4 (10.7-19.3)             |
| ≥1 <sup>c</sup>                        | 23                               | 20.0 (13.2-30.2)             | 15           | 15.6 (9.4-26.0)              | 38         | 35.6 (25.8-49.0)             |

<sup>a</sup> Excludes people with no follow-up at ages 35-74 years or with evidence of pre-existing disease (self-reported cancer, MI, angina, heart failure, rheumatic heart disease, stroke, diabetes, TB, liver cirrhosis or chronic hepatitis) or quit drinking or smoking due to illness.

<sup>b</sup> Did not quit because of illness.

<sup>c</sup> Half-litre bottles of vodka per week.

**Russia: 2-page baseline questionnaire (for phase 1 of recruitment, Jan-Dec 1999)**

- City (1=Barnaul, 4=Tomsk)
- Interviewer number
- Household number (consecutive)
- Questionnaire number

Address.....

Telephone..... Full name.....

If proxy interview, give name of informant .....

& proxy's relation to subject (0=self, 1=spouse, 2=sibling, 3=parent, 4=adult child, 5=other)

- Gender (1=male, 2=female)       Age         Date of birth (dd/mm/yyyy)
- Education completed (0=elementary, 1=secondary, 2=special secondary, 3=higher)
- Marital status (0=never married, 1=divorced, 2=widow(er)ed, 3=currently married)
- Profession (0=uniformed services, 1=labourer, 2=office worker, 3=self-employed, 4=housewife, 5=disabled, 6=unemployed, 7=retired, 8=other)
- Welfare (self-rating) (0=very poor, 1=poor, 2=fair, 4=good)

**Medical history (questions 1-7)**

Disease ever definitely or probably confirmed by a doctor (0=no, 1=yes), and, if so, approximate age when first diagnosed, and any important problems remaining (0=no, 1=yes)?

- |                                                                                                                                                                                                              | Age at first onset                                | Still a problem?         |
|--------------------------------------------------------------------------------------------------------------------------------------------------------------------------------------------------------------|---------------------------------------------------|--------------------------|
| 1. <input type="checkbox"/> Cancer? If Yes:                                                                                                                                                                  |                                                   |                          |
| <input type="checkbox"/> <input type="checkbox"/> Site of origin                                                                                                                                             | <input type="checkbox"/> <input type="checkbox"/> | <input type="checkbox"/> |
| (1=mouth or pharynx, 2=oesophagus, 3=stomach, 4=colon or rectum, 5=pancreas, 6=liver, 7=lung, 8=melanoma, 9=breast, 10=prostate, 11=bladder, 12=leukaemia or lymphoma, 13=other, 0=unknown or multiple site) |                                                   |                          |
| 2. <input type="checkbox"/> Heart disease? If Yes:                                                                                                                                                           |                                                   |                          |
| <input type="checkbox"/> Rheumatic heart disease                                                                                                                                                             | <input type="checkbox"/> <input type="checkbox"/> | <input type="checkbox"/> |
| <input type="checkbox"/> Angina pectoris                                                                                                                                                                     | <input type="checkbox"/> <input type="checkbox"/> | <input type="checkbox"/> |
| <input type="checkbox"/> Myocardial infarction                                                                                                                                                               | <input type="checkbox"/> <input type="checkbox"/> | <input type="checkbox"/> |
| <input type="checkbox"/> Heart failure                                                                                                                                                                       | <input type="checkbox"/> <input type="checkbox"/> | <input type="checkbox"/> |
| <input type="checkbox"/> Other heart disease                                                                                                                                                                 | <input type="checkbox"/> <input type="checkbox"/> | <input type="checkbox"/> |
| (please specify.....)                                                                                                                                                                                        |                                                   |                          |
| 3. <input type="checkbox"/> Stroke                                                                                                                                                                           | <input type="checkbox"/> <input type="checkbox"/> | <input type="checkbox"/> |
| 4. <input type="checkbox"/> Severe depression<br>(impaired mood, indifference, feeling of hopelessness, etc)                                                                                                 | <input type="checkbox"/> <input type="checkbox"/> | <input type="checkbox"/> |
| 5. <input type="checkbox"/> Liver disease? If Yes:                                                                                                                                                           |                                                   |                          |
| <input type="checkbox"/> Liver cirrhosis                                                                                                                                                                     | <input type="checkbox"/> <input type="checkbox"/> | <input type="checkbox"/> |
| <input type="checkbox"/> Chronic hepatitis                                                                                                                                                                   | <input type="checkbox"/> <input type="checkbox"/> | <input type="checkbox"/> |
| <input type="checkbox"/> Cholelithiasis                                                                                                                                                                      | <input type="checkbox"/> <input type="checkbox"/> | <input type="checkbox"/> |
| <input type="checkbox"/> Other liver disease                                                                                                                                                                 | <input type="checkbox"/> <input type="checkbox"/> | <input type="checkbox"/> |
| (please specify.....)                                                                                                                                                                                        |                                                   |                          |

## Russia: 2-page baseline questionnaire (for phase 1 of recruitment, Jan-Dec 1999)

- |                                                                               | Age at<br>first onset                     | Still a<br>problem?      |
|-------------------------------------------------------------------------------|-------------------------------------------|--------------------------|
| 6. <input type="checkbox"/> Any severe disability? If Yes:                    |                                           |                          |
| <input type="checkbox"/> Arthritis                                            | <input type="text"/> <input type="text"/> | <input type="checkbox"/> |
| <input type="checkbox"/> Deafness                                             | <input type="text"/> <input type="text"/> | <input type="checkbox"/> |
| <input type="checkbox"/> Blindness                                            | <input type="text"/> <input type="text"/> | <input type="checkbox"/> |
| <input type="checkbox"/> Memory loss                                          | <input type="text"/> <input type="text"/> | <input type="checkbox"/> |
| <input type="checkbox"/> Parkinson's disease                                  | <input type="text"/> <input type="text"/> | <input type="checkbox"/> |
| <input type="checkbox"/> Other                                                | <input type="text"/> <input type="text"/> | <input type="checkbox"/> |
| (please specify.....)                                                         |                                           |                          |
| 7. <input type="checkbox"/> Any medication on most days during the past year? |                                           |                          |
| <input type="checkbox"/> Anti-diabetic (specify).....                         |                                           |                          |
| <input type="checkbox"/> Anti-hypertensive.....                               |                                           |                          |
| <input type="checkbox"/> Anti-inflammatory (specify, eg, aspirin).....        |                                           |                          |
| <input type="checkbox"/> Other daily (specify medication and reason).....     |                                           |                          |

## Smoking

- Do you currently smoke? (0=no, 1=yes)
- a) If No (ie, non- or ex-smoker):
- Ever smoked on most days for at least one year? (0=no, 1=yes)
- Years since stopped?       Did you stop because you were ill (0/1)?
- b) If Yes (ie, current smoker):
- How many cigarettes/day? (include "papirosa" cigarettes and hand-rolled cigarettes)
- Age began smoking

## Alcohol

- Have you used any alcohol in the last year? (0=no, 1=yes)
- a) If No (ie, non- or ex-drinker):
- Have you ever used alcohol at least once a month for a year?
- Years since stopped?       Did you stop because you were ill? (0=no, 1=yes)
- b) If Yes, then over the past year:
- How many days per week do you have some alcohol? (0=considerably less than weekly)
- How many days per week do you have some alcohol before noon?

How much vodka or other strong drink (about 40% or stronger) do you usually drink per week?  
(0=none at all; if a range is given [eg, 2 or 3 bottles] then enter the upper end of the range)

g per week      or       bottles per week (1 bottle = 500g = 0.5L)

What has been the most vodka you ever drank in one day?

g per day      or       bottles per day

Name of interviewer (PRINT).....

Date of interview.....

- Quality of interview: (0=poor, 1=fair, 2=good)

**Russia: 5-page baseline questionnaire (for phase 2 of recruitment, 2002-2008)**

ID barcode:

|  |
|--|
|  |
|--|

**Part 1: Identifiers**

- City (1=Barnaul, 2=Byisk, 4=Tomsk)
- Household no. (allocated consecutively)
- Subject no. in household (allocated consecutively)
- Relation to decedent (1=relative, 2=neighbour, 3=non-relative at this address, 4=other of age 30-74)

Address.....

Telephone..... Full name.....

- Sex (1=M, 2=F)     Ethnicity     Age (30-74)    // Date of birth (dd/mm/year)

- Highest education completed (0=none, 1=primary, 2=secondary, 3=special secondary, 4=higher)
- Marital status (0=never married, 1=divorced, 2=widow(er)ed, 3=currently married)
- Present circumstances (0=very bad, 1=bad, 2=middle, 3=good)
- Have your circumstances changed in recent years? (0=worse, 1=no change, 2=improved)

**Part 2: Education and employment**

- Employed now (0=no, 1=yes)?
- If Yes:  Are you working at your specialty? (0=no, 1=yes)
- Have your job circumstances changed? (0=worse, 1=no change, 2=improved)
- Months unpaid in past year
- If No:  Why not? (0=retired, 1=lost job, 2=student, 3=invalid, 4=housewife)
- How many months have you been unemployed?
- Usual job (1=worker, 2=farmer, 3=salaried, 4=uniformed, 5=service sector, 6=sports, 7=none)
- Main work exposure (0=none, 1=radiation, 2=solvents, 3=oil, 4=asbestos, 5=pesticides, 6=welding, 7=dioxin)
- Industry (1=agriculture/forestry, 2=mining, 3=food/drink/tobacco, 4=textiles, 5=leather/fur, 6=wood/furniture, 7=paper/printing, 8=coke/oil, 9=chemicals/medicines, 10=rubber/plastics, 11=building materials, 12=metal production, 13=machinery, 14=electrical appliances, 15=vehicle manufacture, 16=utilities, 17=construction, 18=driver, 19=other)



**Russia: 5-page baseline questionnaire (for phase 2 of recruitment, 2002-2008)****Part 3: Medical history:**

Disease ever definitely or probably confirmed by a doctor (0=no, 1=yes), and, if so, approximate age when first diagnosed, and any important problems still remaining (0=no, 1=yes)?

|                                                                                                                                                                                                                                                                                        | Age at<br>first onset                     | Still a<br>problem?                             |
|----------------------------------------------------------------------------------------------------------------------------------------------------------------------------------------------------------------------------------------------------------------------------------------|-------------------------------------------|-------------------------------------------------|
| <input type="checkbox"/> Rheumatic heart disease                                                                                                                                                                                                                                       | <input type="text"/> <input type="text"/> | <input type="checkbox"/>                        |
| <input type="checkbox"/> Angina pectoris                                                                                                                                                                                                                                               | <input type="text"/> <input type="text"/> | <input type="checkbox"/>                        |
| <input type="checkbox"/> Myocardial infarction                                                                                                                                                                                                                                         | <input type="text"/> <input type="text"/> | <input type="checkbox"/>                        |
| <input type="checkbox"/> Heart failure                                                                                                                                                                                                                                                 | <input type="text"/> <input type="text"/> | <input type="checkbox"/>                        |
| <input type="checkbox"/> Stroke                                                                                                                                                                                                                                                        | <input type="text"/> <input type="text"/> | <input type="checkbox"/>                        |
| <input type="checkbox"/> Hypertension                                                                                                                                                                                                                                                  | <input type="text"/> <input type="text"/> | <input type="checkbox"/>                        |
| <input type="checkbox"/> COPD                                                                                                                                                                                                                                                          | <input type="text"/> <input type="text"/> | <input type="checkbox"/>                        |
| <input type="checkbox"/> Neoplasm (cancer); If Yes:                                                                                                                                                                                                                                    |                                           |                                                 |
| <input type="checkbox"/> <input type="text"/> Site of origin of cancer                                                                                                                                                                                                                 | <input type="text"/> <input type="text"/> | <input type="checkbox"/>                        |
| (1=mouth or pharynx, 2=oesophagus, 3=stomach, 4=colon or rectum, 5=pancreas, 6=liver, 7=larynx, 8=lung, 9=melanoma, 10=breast, 11=cervix, 12=other parts of uterus, 13=prostate, 14=bladder, 15=kidney, 16=thyroid, 17=leukaemia or lymphoma, 18=other, unknown or more than one site) |                                           |                                                 |
| <input type="checkbox"/> Tuberculosis                                                                                                                                                                                                                                                  | <input type="text"/> <input type="text"/> | <input type="checkbox"/>                        |
| <input type="checkbox"/> Liver cirrhosis                                                                                                                                                                                                                                               | <input type="text"/> <input type="text"/> | <input type="checkbox"/>                        |
| <input type="checkbox"/> Chronic hepatitis                                                                                                                                                                                                                                             | <input type="text"/> <input type="text"/> | <input type="checkbox"/>                        |
| <input type="checkbox"/> Chole-cystitis/-lithiasis                                                                                                                                                                                                                                     | <input type="text"/> <input type="text"/> | <input type="checkbox"/>                        |
| <input type="checkbox"/> Gastric ulcer                                                                                                                                                                                                                                                 | <input type="text"/> <input type="text"/> | <input type="checkbox"/>                        |
| <input type="checkbox"/> Colorectal polyps                                                                                                                                                                                                                                             | <input type="text"/> <input type="text"/> | <input type="checkbox"/>                        |
| <input type="checkbox"/> Diabetes mellitus                                                                                                                                                                                                                                             | <input type="text"/> <input type="text"/> | <input type="checkbox"/>                        |
| <input type="checkbox"/> Severe depression                                                                                                                                                                                                                                             | <input type="text"/> <input type="text"/> | <input type="checkbox"/>                        |
| <input type="checkbox"/> Disability                                                                                                                                                                                                                                                    | <input type="text"/> <input type="text"/> | <input type="checkbox"/>                        |
| <input type="checkbox"/> Any medication on most days during the last year (0=no, 1=yes)? If Yes:                                                                                                                                                                                       |                                           |                                                 |
| <input type="checkbox"/> Anti-diabetic                                                                                                                                                                                                                                                 |                                           | <input type="checkbox"/> Antihypertensive       |
| <input type="checkbox"/> Anti-inflammatory (eg, aspirin)                                                                                                                                                                                                                               |                                           | <input type="checkbox"/> Other daily medication |

**Russia: 5-page baseline questionnaire (for phase 2 of recruitment, 2002-2008)****Part 4: Tobacco**

Do you smoke? (0=no, 1=yes)

If Yes (ie, current smoker):

How many cigarettes per day? (include "papirosa" and hand-rolled cigarettes; exclude pipe)

Age began smoking (ie, using any type of tobacco on most days)

How many years have you smoked?

If No (ie, never- or ex-smoker):

Ever smoked (on most days for a year)? (0=no, 1=yes)

If yes:

Age first began smoking

Age last stopped smoking

Years since you last stopped

Did you stop because you were ill? (0=no, 1=yes)

If never-smoker:

Did you ever live or work with a smoker? (0=no, 1=yes)

If Yes: Please enter the ages at which you were exposed to their smoke:

|              | <i>From age</i>      | <i>To age</i>        |
|--------------|----------------------|----------------------|
| Spouse(s)    | <input type="text"/> | <input type="text"/> |
| Parent(s)    | <input type="text"/> | <input type="text"/> |
| Colleague(s) | <input type="text"/> | <input type="text"/> |

**Part 5: Alcohol**

Do you drink any alcohol? (0=no, 1=yes)

If Yes, then:

How many days/week do you have some alcohol (0-7)? (0 means none for most weeks)

How many days/week do you have some alcohol before noon (0-7)? (0 means none for most weeks)

How much alcohol do you usually drink per week? (0=none at all; if a range is given, eg, 2 or 3 bottles, then enter the upper end of that range)

Vodka or other strong drinks (about 40% alcohol, or stronger)

ml/week or  bottles/week (vodka bottle=500ml)

Wine 20%

ml/week or  bottles/week (wine bottle=750ml)

Wine 10-12%

ml/week or  bottles/week (wine bottle=750ml)

Beer

bottles/week (beer bottle=500ml)

**Russia: 5-page baseline questionnaire (for phase 2 of recruitment, 2002-2008)**

What was the most vodka you ever drank in one day?

ml/day or  bottles/day (vodka bottle=500ml)

Have you ever drunk alcoholic liquids not intended for consumption (non-beverage alcohol) at least once a month for a year? (0=no, 1=yes)

[then go to Part 6]

**If No (ie, non-drinker):**

Have you ever used alcohol at least once a month for a year? If Yes (used):

How many days/week did you have some alcohol (0-7)? (0 means none in most weeks)

How many days/week did you have some alcohol before noon (0-7)? (0 means none in most weeks)

How much alcohol did you usually drink/week?

If a range is given (eg, 2 or 3 bottles) then enter the upper end of the range (0=not at all)

Vodka or other strong drinks (40%)

ml/week or  bottles/week (bottle=500ml)

Wine 20%

ml/week or  bottles/week (bottle=750ml)

Wine 10-12%

ml/week or  bottles/week (bottle=750ml)

Beer

bottles/week (bottle=500ml)

What was the most vodka you ever drank in one day?

ml/day or  bottles/day (vodka bottle=500ml)

Have you ever drunk spirit containing liquids not intended for consumption (non-beverage alcohol) at least once a month for a year? (0=No, 1=Yes)

Years since you last stopped drinking any alcohol  Did you stop because you were ill (0/1)?

**Part 6: Diet**

How often do you eat the following fresh fruits and vegetables?

(0=never, 1=no more than once a month, 2=1 to 3 times a month, 3=once or twice a week, 4=most days but not every day, 5=every day)

Apples or pears

Oranges and other citrus fruits

Bananas

Berries (in season)

Greens and green onions (in season)

Carrots

Tomatoes (in season)

**Russia: 5-page baseline questionnaire (for phase 2 of recruitment, 2002-2008)**

**Part 7: Blood pressure, height, weight and build** (blank for absent subjects)

Blood pressure should be measured seated:

/   SBP / DBP before the interview

/   SBP / DBP after the interview

Height and weight should be measured without shoes in light clothing

Height cm

Weight kg

Waist cm

Hip cm

**Part 8: Biological sample collection**

If participant agrees, cut a sample of hair from back of head and seal in a bag with the ID number

Hair sample provided? (0=no, 1=yes)

If subject agrees, take a sample of blood via capillary puncture of the finger (10 blood spots on special filter paper) and seal it in a bag with the ID number

Blood sample provided (0=no, 1=yes)

**Part 9: Description of interview**

Name of interviewer (PRINT): .....

Interviewer's identification number

/   /    Date of interview (dd/mm/year)

Quality of co-operation (0=poor, 1=fair, 2=good)
